# Supplementary material for: On the Characterization and Correlation of Compositional, Antioxidant and Colour Profile of Common and Balsamic Vinegars
Source: PubMed Central journal article supplement (PMC6210356; doi:10.3390/antiox7100139), 2018-10-11
Supplement: antioxidants-07-00139-s001.pdf [file antioxidants-07-00139-s001.pdf]

**Table S1.** Target and qualifier ions for the trimethylsilyl ethers (TMS) of phenolic compounds and the internal standard (IS).

| Compound                              | Target ions ( <i>m/z</i> ) | Qualifier ions ( <i>m/z</i> ) |
|---------------------------------------|----------------------------|-------------------------------|
| Vanillin                              | 194                        | 209                           |
| Cinnamic acid                         | 205                        | 220                           |
| Tyrosol                               | 179                        | 267,282                       |
| p-Hydroxy-benzoic acid                | 267                        | 223,193                       |
| p-Hydroxy-phenylacetic acid           | 252                        | 296,281                       |
| 3-(4-hydroxyphenyl)-1-propanol (I.S.) | 206                        | 191,179                       |
| Phloretic acid                        | 192                        | 310                           |
| Vanillic acid                         | 297                        | 267,312                       |
| Homovanillic alcohol                  | 326                        | 267,311                       |
| Protocatechuic acid                   | 193                        | 355,370                       |
| 3-4 Di-hydroxy-phenylacetic acid      | 384                        | 267,179                       |
| Syringic acid                         | 327                        | 342,312                       |
| o-Coumaric acid                       | 293                        | 308,147                       |
| p-Coumaric acid                       | 308                        | 293,219                       |
| Gallic acid                           | 281                        | 458,443                       |
| Ferulic acid                          | 338                        | 323,308                       |
| Caffeic acid                          | 396                        | 219,381                       |
| Sinapic acid                          | 368                        | 353,338                       |
| Resveratrol                           | 444                        | 445,443                       |
| Chrysin                               | 383                        | 355,474                       |
| Epicatechin                           | 368                        | 355,474                       |
| Naringenin                            | 473                        | 296                           |
| Catechin                              | 368                        | 355,474                       |
| Kaempferol                            | 559                        | 560                           |
| Quercetin                             | 647                        | 559,575                       |

**Table S2.** Total phenolic content, radical scavenging and antioxidant activity of balsamic vinegars samples.

|      | mg Gallic acid E /L | mg Trolox E /L  | mg FeSO <sub>4</sub> ·7H <sub>2</sub> O / L |
|------|---------------------|-----------------|---------------------------------------------|
| BR1  | 1268.50 ± 22.91     | 1469.95 ± 5.22  | 11299.19 ± 150.74                           |
| BR2  | 1251.83 ± 20.21     | 1216.64 ± 9.04  | 11936.87 ± 210.22                           |
| BR3  | 853.50 ± 27.84      | 1014.41 ± 36.68 | 7689.42 ± 162.18                            |
| BR4  | 1733.50 ± 10.00     | 1897.19 ± 13.59 | 12307.55 ± 167.60                           |
| BR5  | 1660.67 ± 20.00     | 1958.11 ± 26.11 | 17512.60 ± 128.99                           |
| BR6  | 2867.33 ± 61.10     | 4417.44 ± 52.22 | 26293.23 ± 128.99                           |
| BR7  | 1355.17 ± 43.68     | 1187.05 ± 28.76 | 11936.87 ± 58.30                            |
| BR8  | 1647.33 ± 50.33     | 1524.72 ± 46.41 | 10647.19 ± 173.89                           |
| BR9  | 1220.17 ± 22.55     | 1797.17 ± 31.47 | 14160.98 ± 127.60                           |
| BR10 | 2434.00 ± 46.19     | 3133.46 ± 34.54 | 22949.33 ± 157.70                           |
| BR11 | 1481.83 ± 45.09     | 1590.86 ± 18.34 | 12006.37 ± 141.56                           |
| BR12 | 908.50 ± 13.23      | 1147.02 ± 19.77 | 8029.22 ± 197.04                            |
| BRH1 | 560.70 ± 6.56       | 925.97 ± 30.60  | 3635.04 ± 106.17                            |
| BRH2 | 753.70 ± 10.00      | 980.39 ± 22.76  | 9921.26 ± 70.78                             |
| BRH3 | 734.00 ± 40.00      | 1194.01 ± 13.14 | 11620.24 ± 116.61                           |
| BRH4 | 713.50 ± 35.00      | 908.56 ± 32.61  | 8453.96 ± 106.17                            |
| BRH5 | 847.33 ± 61.10      | 1267.11 ± 18.34 | 11674.30 ± 167.07                           |

|     |                |                |                 |
|-----|----------------|----------------|-----------------|
| BW1 | 146.83 ± 12.58 | 309.82 ± 25.76 | 3284.97 ± 37.29 |
| BW2 | 153.70 ± 6.56  | 143.59 ± 1.38  | 1571.32 ± 43.12 |
| BW3 | 137.03 ± 5.51  | 110.52 ± 5.23  | 1451.62 ± 15.77 |

**Table S3.** Total phenolic content, radical scavenging and antioxidant activity of common vinegars samples.

|      | <b>mg Gallic acid E /L</b> | <b>mg Trolox E /L</b> | <b>mg FeSO<sub>4</sub>·7H<sub>2</sub>O/ L</b> |
|------|----------------------------|-----------------------|-----------------------------------------------|
| WR1  | 218.73 ± 13.32             | 618.76 ± 25.71        | 3320.09 ± 160.53                              |
| WR2  | 382.73 ± 12.22             | 966.38 ± 27.67        | 5497.76 ± 69.55                               |
| WR3  | 134.70 ± 5.57              | 247.16 ± 5.28         | 1994.42 ± 87.57                               |
| WR4  | 350.73 ± 15.01             | 849.93 ± 57.75        | 5286.17 ± 134.85                              |
| WR5  | 184.70 ± 2.00              | 337.23 ± 4.20         | 2765.87 ± 46.51                               |
| WR6  | 268.07 ± 2.31              | 647.16 ± 15.95        | 3534.77 ± 34.98                               |
| WR7  | 236.73 ± 12.06             | 607.45 ± 25.62        | 3667.59 ± 111.23                              |
| WR8  | 170.07 ± 1.15              | 458.55 ± 31.15        | 2861.39 ± 95.11                               |
| WR9  | 247.37 ± 2.31              | 476.91 ± 2.72         | 2161.99 ± 9.36                                |
| WR10 | 199.40 ± 13.11             | 333.48 ± 76.44        | 2479.91 ± 70.32                               |
| WW1  | 185.75 ± 2.41              | 177.54 ± 12.45        | 867.75 ± 52.69                                |
| WW2  | 61.61 ± 2.27               | 60.05 ± 3.13          | 395.90 ± 35.31                                |
| WW3  | 29.75 ± 5.37               | 30.63 ± 8.76          | 92.31 ± 6.03                                  |
| WW4  | 94.28 ± 2.62               | 81.63 ± 1.83          | 802.09 ± 79.39                                |
| WW5  | 54.03 ± 8.50               | 74.84 ± 15.68         | 804.25 ± 23.15                                |
| WW6  | 161.48 ± 2.00              | 238.45 ± 4.58         | 1500.20 ± 93.66                               |
| WW7  | 146.37 ± 2.52              | 305.03 ± 11.10        | 1873.95 ± 14.47                               |
| WW8  | 139.03 ± 1.53              | 116.62 ± 2.63         | 1040.86 ± 14.87                               |
| F1   | 82.70 ± 5.29               | 127.93 ± 5.98         | 736.47 ± 36.41                                |
| F2   | 88.37 ± 6.43               | 61.44 ± 5.36          | 652.59 ± 31.76                                |
| F3   | 78.28 ± 0.80               | 219.74 ± 19.24        | 582.80 ± 19.29                                |
| F4   | 17.88 ± 1.20               | 46.12 ± 1.68          | 350.50 ± 6.70                                 |
| F5   | 428.37 ± 10.79             | 496.49 ± 13.84        | 2409.87 ± 154.55                              |



**Table S5.** Major phenolic compounds of the common vinegars (% of total quantified phenols).

| Compounds                      | WR1   | WR2   | WR3   | WR4   | WR5   | WR6   | WR7   | WR8   | WR9   | WR10  | WW1   | WW2   | WW3   | WW4   | WW5   | WW6   | WW7   | WW8   | F1    | F2    | F3    | F4    | F5    |
|--------------------------------|-------|-------|-------|-------|-------|-------|-------|-------|-------|-------|-------|-------|-------|-------|-------|-------|-------|-------|-------|-------|-------|-------|-------|
| <b>Phenolic alcohol</b>        |       |       |       |       |       |       |       |       |       |       |       |       |       |       |       |       |       |       |       |       |       |       |       |
| Homovanillyl alcohol           | 0.14  | 0.15  | 0.89  | 0.13  | 0.80  | 0.24  | 0.02  | 0.39  | -     | 0.19  | 0.10  | -     | -     | 0.37  | 0.06  | 0.37  | 0.21  | 0.13  | 0.64  | 0.31  | 0.49  | 0.33  | 0.03  |
| Tyrosol                        | 3.64  | 5.26  | 13.86 | 4.35  | 9.45  | 4.50  | 0.78  | 17.16 | 2.11  | 4.64  | 1.84  | 19.17 | 11.90 | 7.98  | 2.15  | 7.98  | 4.35  | 4.70  | 16.50 | 6.48  | 13.27 | 0.05  | 0.89  |
| <b>Phenolic acids</b>          |       |       |       |       |       |       |       |       |       |       |       |       |       |       |       |       |       |       |       |       |       |       |       |
| Caffeic acid                   | 8.66  | 10.21 | 6.86  | 10.81 | 3.95  | 2.35  | 4.44  | 17.82 | 1.25  | 2.69  | 4.04  | 4.49  | 1.37  | 1.77  | 9.48  | 1.77  | 35.00 | 8.25  | 3.49  | 1.60  | 0.95  | 2.12  | 1.17  |
| Cinnamic acid                  | 0.02  | 0.35  | 0.13  | 0.09  | 0.27  | 0.08  | 0.02  | 0.08  | 0.04  | 0.02  | -     | 0.67  | 3.79  | 0.12  | 0.10  | 0.12  | 0.13  | 0.11  | 0.60  | 0.06  | 0.23  | 1.05  | 0.01  |
| o-Coumaric acid                | 1.21  | -     | 1.44  | -     | 1.34  | -     | 0.11  | 7.37  | 0.21  | 0.42  | 0.23  | -     | -     | -     | -     | -     | 2.59  | 1.96  | -     | -     | 0.63  | -     | 2.40  |
| p-Coumaric acid                | 1.53  | 1.04  | 3.72  | 0.95  | 1.91  | 1.45  | 0.50  | 4.46  | 0.31  | 0.59  | 0.98  | 1.62  | 2.14  | 0.85  | 0.52  | 0.85  | 2.22  | 1.31  | 0.51  | 0.52  | 0.56  | 1.43  | 0.64  |
| 3,4-Dihydroxyphenylacetic acid | 0.09  | 0.52  | -     | 0.49  | -     | 0.07  | 0.01  | 0.13  | 0.06  | 0.06  | 0.06  | -     | -     | -     | 2.08  | -     | 1.42  | 0.07  | -     | -     | -     | -     | 0.08  |
| Ferulic acid                   | 0.16  | 0.22  | 0.36  | 0.20  | 0.94  | 0.17  | 0.03  | 0.59  | 0.06  | 0.06  | 0.16  | 2.45  | 0.27  | 0.18  | 0.09  | 0.18  | 1.16  | 0.20  | 0.25  | 0.05  | -     | 0.16  | 0.06  |
| Gallic acid                    | 63.71 | 47.20 | 19.34 | 51.19 | 25.84 | 53.85 | 90.29 | 17.52 | 65.34 | 64.97 | 77.86 | 19.78 | 10.40 | 48.31 | 7.45  | 48.31 | 9.53  | 69.91 | 7.17  | 16.12 | 1.11  | 91.56 | 52.30 |
| p-Hydroxybenzoic acid          | 0.77  | 1.08  | 8.91  | 0.98  | 5.87  | 1.30  | 0.09  | 5.33  | 0.90  | 0.85  | 0.81  | 5.79  | 9.36  | 3.48  | 0.77  | 3.48  | 1.74  | 1.18  | 10.48 | 4.11  | 6.38  | 0.66  | 0.37  |
| 4-Hydroxyphenylacetic acid     | 0.23  | 0.88  | 20.87 | 0.55  | 2.11  | 0.51  | 0.22  | 4.37  | 0.36  | 1.35  | 0.23  | 19.01 | 2.22  | 1.09  | 0.59  | 1.09  | 0.91  | 3.90  | 6.15  | 2.55  | 7.13  | 0.23  | 0.41  |
| Phloretic acid                 | 3.96  | 3.39  | 4.14  | 3.30  | 7.64  | 4.15  | 0.43  | 3.88  | 10.13 | 6.03  | 1.78  | 5.25  | 10.41 | 6.59  | 0.92  | 6.59  | 2.23  | 1.57  | 29.41 | 11.07 | 62.23 | -     | 1.22  |
| Protocatechuic acid            | 1.61  | 3.44  | 15.57 | 3.64  | 4.51  | 2.19  | 0.90  | 9.72  | 2.03  | 2.14  | 2.39  | 20.68 | 4.70  | 5.81  | 2.52  | 5.81  | 4.76  | 4.00  | 13.44 | 5.52  | 1.31  | 0.76  | 15.94 |
| Sinapic acid                   | -     | -     | -     | -     | -     | -     | -     | -     | -     | -     | 0.04  | 0.05  | 0.08  | 0.07  | 0.05  | 0.07  | 0.07  | 0.06  | -     | 0.09  | -     | -     | 0.38  |
| Syringic acid                  | 1.70  | 1.12  | 1.10  | 0.79  | 2.43  | 1.40  | 0.97  | 2.29  | 2.32  | 1.20  | 0.30  | -     | -     | 1.59  | 0.55  | 1.59  | 1.71  | 0.53  | 1.35  | 0.70  | -     | 0.35  | 0.11  |
| Vanillic acid                  | 0.51  | 1.40  | 1.99  | 1.32  | 1.64  | 0.45  | 0.23  | 8.55  | 0.64  | 0.51  | 0.14  | 1.02  | 1.19  | 1.22  | 0.16  | 1.22  | 2.07  | 0.35  | 0.58  | 0.24  | 0.12  | 0.25  | 0.53  |
| <b>Phenolic aldehyde</b>       |       |       |       |       |       |       |       |       |       |       |       |       |       |       |       |       |       |       |       |       |       |       |       |
| Vanillin                       | 0.04  | 0.04  | 0.82  | 0.05  | 0.50  | 0.06  | 0.03  | 0.34  | 0.03  | 0.08  | 0.03  | -     | 1.21  | 0.21  | 0.12  | 0.21  | 0.19  | 0.06  | 0.28  | 0.10  | 0.60  | 1.06  | 0.03  |
| <b>Flavan-3-ols</b>            |       |       |       |       |       |       |       |       |       |       |       |       |       |       |       |       |       |       |       |       |       |       |       |
| Epicatechin                    | -     | -     | -     | -     | -     | -     | -     | -     | 0.18  | -     | -     | -     | -     | -     | -     | -     | -     | -     | -     | -     | -     | -     | -     |
| <b>Flavanone</b>               |       |       |       |       |       |       |       |       |       |       |       |       |       |       |       |       |       |       |       |       |       |       |       |
| Naringenin                     | -     | -     | -     | -     | -     | -     | -     | -     | -     | -     | -     | -     | -     | 0.97  | 12.03 | 0.97  | 0.25  | -     | -     | -     | -     | -     | 0.17  |
| <b>Flavones</b>                |       |       |       |       |       |       |       |       |       |       |       |       |       |       |       |       |       |       |       |       |       |       |       |
| Chrysin                        | 0.44  | -     | -     | 1.49  | 30.80 | -     | 0.03  | -     | -     | -     | 0.25  | -     | 40.07 | -     | 1.49  | -     | 1.26  | 1.72  | 9.03  | -     | 4.85  | -     | -     |
| <b>Flavonols</b>               |       |       |       |       |       |       |       |       |       |       |       |       |       |       |       |       |       |       |       |       |       |       |       |
| Quercetin                      | 9.54  | 12.67 | -     | 12.43 | -     | 22.59 | 0.89  | -     | 9.31  | 10.55 | 7.59  | -     | -     | -     | 10.26 | -     | 24.09 | -     | -     | 46.33 | -     | -     | 7.83  |
| Kaempferol                     | 1.99  | 11.03 | -     | 7.25  | -     | 4.64  | -     | -     | 4.68  | 3.64  | 1.15  | -     | -     | 19.41 | 48.60 | 19.41 | 4.11  | -     | -     | 4.17  | -     | -     | 15.43 |
| <b>Stilbenoid</b>              |       |       |       |       |       |       |       |       |       |       |       |       |       |       |       |       |       |       |       |       |       |       |       |
| Resveratrol                    | 0.04  | -     | -     | -     | -     | -     | -     | -     | 0.03  | 0.02  | 0.02  | -     | 0.90  | -     | 0.02  | -     | -     | -     | 0.12  | -     | 0.14  | -     | -     |

**Table S6.** Spectra bands intensities of vinegars.

| Regions   | RGBV <sup>a</sup> | RGBVH <sup>b</sup> | WGBV <sup>c</sup> | RGV <sup>d</sup> | WGV <sup>e</sup>  | FV <sup>f</sup>  |
|-----------|-------------------|--------------------|-------------------|------------------|-------------------|------------------|
| 3100–3050 | 0.0121 ± 0.0032a  | 0.0160 ± 0.0023b   | 0.0102 ± 0.0016a  | 0.0027 ± 0.0005c | 0.0022 ± 0.0005c  | 0.0016 ± 0.0013c |
| 2940–2840 | 0.0252 ± 0.0061a  | 0.0324 ± 0.0047b   | 0.0221 ± 0.0030a  | 0.0087 ± 0.0012c | 0.0075 ± 0.0012c  | 0.0065 ± 0.0022c |
| 1730–1700 | 0.0325 ± 0.0009a  | 0.0229 ± 0.0066b   | 0.0305 ± 0.0017ab | 0.0326 ± 0.0037a | 0.0294 ± 0.0046ab | 0.0225 ± 0.0108b |
| 1425–1380 | 0.0375 ± 0.0074a  | 0.0433 ± 0.0044a   | 0.0329 ± 0.0041a  | 0.0187 ± 0.0021b | 0.0163 ± 0.0025b  | 0.0127 ± 0.0050b |
| 1300–1260 | 0.0470 ± 0.0062a  | 0.0469 ± 0.0045a   | 0.0432 ± 0.0039a  | 0.0312 ± 0.0034b | 0.0279 ± 0.0045bc | 0.0205 ± 0.0102c |
| 1080–1040 | 0.0976 ± 0.0334a  | 0.1484 ± 0.0326b   | 0.0835 ± 0.0139a  | 0.0074 ± 0.0023c | 0.0058 ± 0.0014c  | 0.0056 ± 0.0012c |
| 825–810   | 0.0156 ± 0.0052a  | 0.0245 ± 0.0055b   | 0.0130 ± 0.0021a  | 0.0006 ± 0.0001c | 0.0004 ± 0.0001c  | 0.0006 ± 0.0001c |
| 790–770   | 0.0166 ± 0.0056a  | 0.0262 ± 0.0059b   | 0.0139 ± 0.0023a  | 0.0002 ± 0.0001c | 0.0002 ± 0.0001c  | 0.0004 ± 0.0001c |

<sup>a</sup>RGBV: red grape balsamic vinegars ( $n = 12$ ), <sup>b</sup>RGBVH: red grape balsamic vinegars with honey ( $n = 5$ ), <sup>c</sup>WGBV: white grape balsamic vinegars ( $n = 3$ ), <sup>d</sup>RGV: red grape vinegars ( $n = 10$ ), <sup>e</sup>WGV: white grape vinegars ( $n = 8$ ), <sup>f</sup>FV: fruit vinegars ( $n = 5$ ).

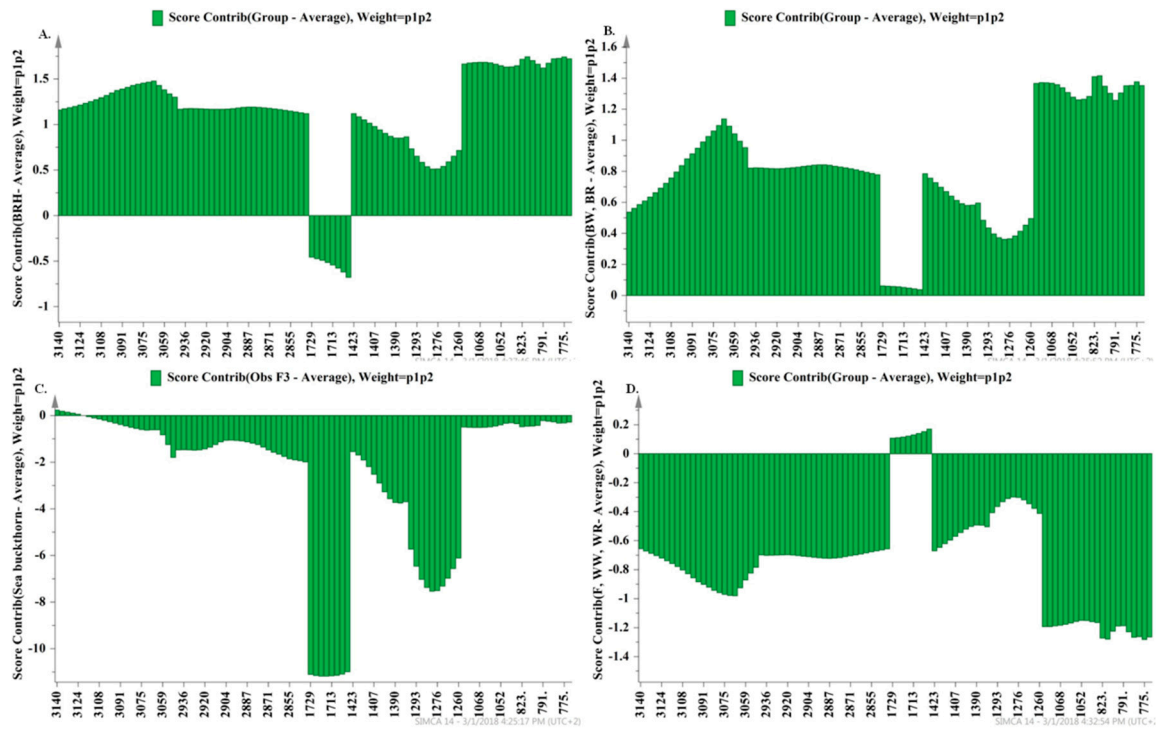

**Figure S1.** Contribution plots extracted from the PCA model. (A) Contribution plot of the balsamic vinegars with honey, (B) Contribution plot of the red and white balsamic vinegars, (C) Contribution plot of the vinegar with the embedded Sea Buckthorn, (D) Contribution plot of the common vinegars.

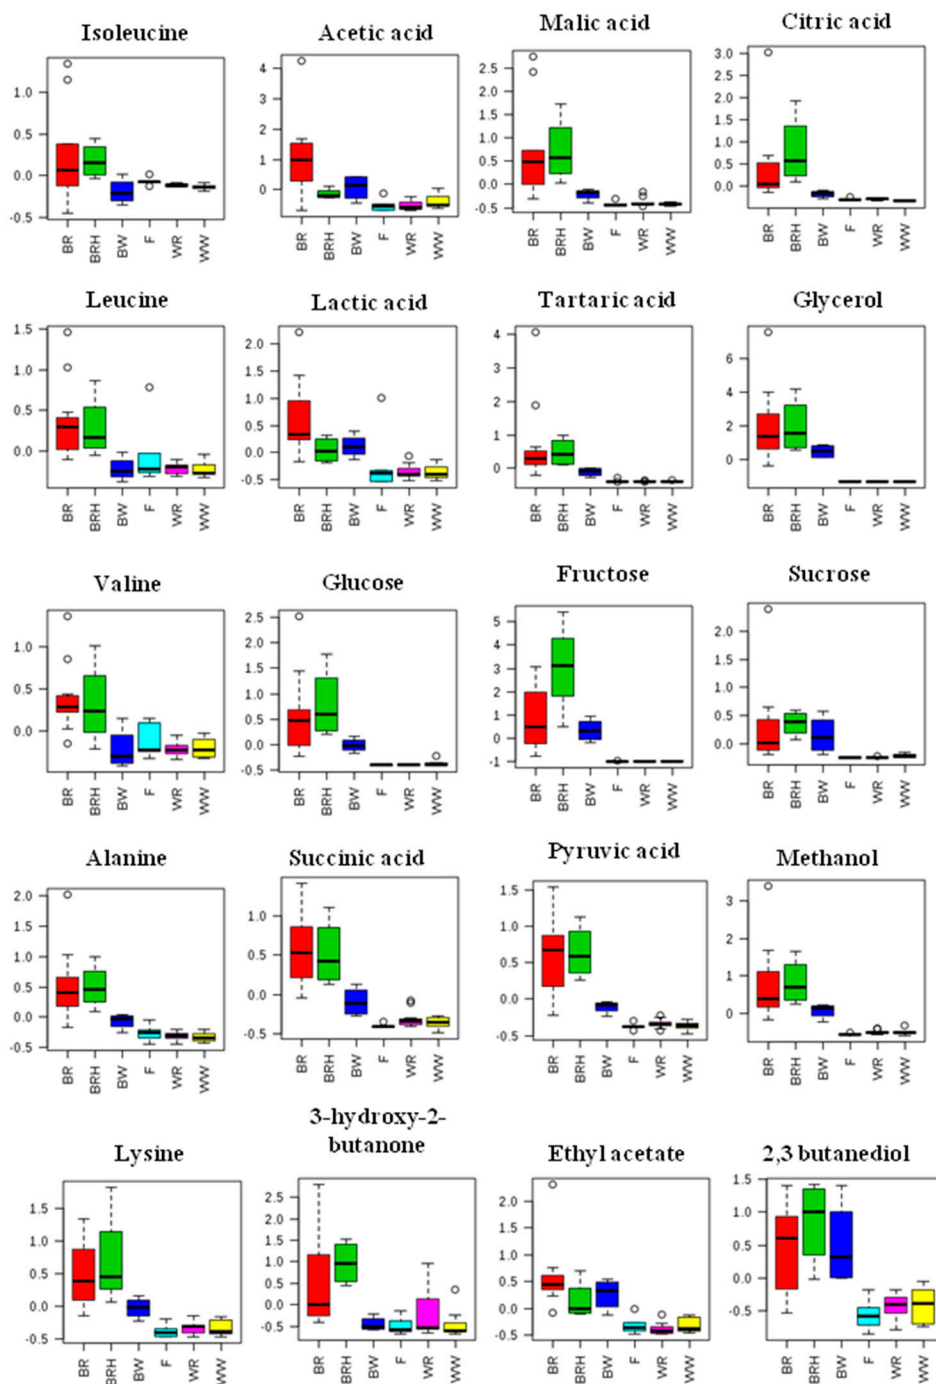

**Figure S2.** Box plots of the significant metabolites as pinpointed by Anova on the NMR data (BRH= balsamic vinegars with honey, BR= red balsamic vinegars, BW= white balsamic vinegars, WR= red common vinegars, WW= white common vinegars, F= common vinegars from fruits)
